# Supplementary material for: Modeling Pulmonary Cystic Fibrosis in a Human Lung Airway-on-a-chip
Source: bioRxiv or medRxiv preprint supplement (doi:10.1101/2021.07.15.21260407), 2021-07-19
Supplement: Supplementary file [file media-1.pdf]

### **Supplementary Figures**

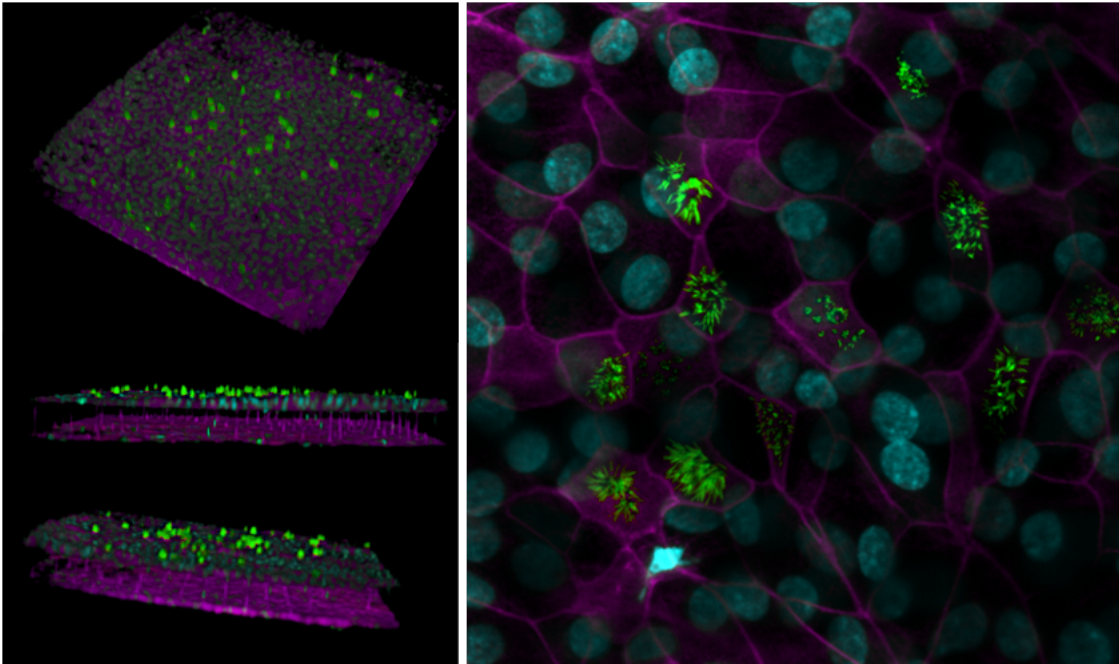

**Supplementary Figure S1.** Confocal immunofluorescence micrographic 3D reconstruction of the interface between the pseudostratified epithelium and endothelium in the human Airway Chip when viewed from above and the side (left) and a higher magnification view from above of the epithelium stained for  $\beta$ -tubulin IV (green) and ZO-1 (magenta) to show the ciliated epithelial cells cultured on top of the porous PDMS membrane and for CD31 to visualize the endothelium below (bar, 50  $\mu$ m).
